# Supplementary material
Source: publisher site journal article supplement (https://www.dovepress.com/article/454521)
Supplement: Supplementary file 1 [file get_supplementary_file.php]

## Supplemental material

*This is an additional material of the research article titled “Development and validation of a novel predictive model for the early differentiation of cardiac and non-cardiac syncope”.*

**Table S1.** The list of 36 candidate variables for the prediction of cardiac syncope.

| Characteristics             | Variables                                                                                                                                                                                                    |
|-----------------------------|--------------------------------------------------------------------------------------------------------------------------------------------------------------------------------------------------------------|
| Demographics                | sex, age, body mass index (BMI), resting systolic blood pressure (SBP), resting diastolic blood pressure (DBP), heart rate (HR), smoking history, and drinking history                                       |
| Syncopal event details      | the number of syncopal episodes, duration of syncopal spell, presence of specific triggers, syncope while sitting or lying or exertion, chest symptoms preceding syncope, and family history of syncope      |
| Comorbidities               | hypertension, diabetes, dyslipidemia, heart disease, vascular disease, chronic obstructive pulmonary disease (COPD), and obstructive sleep apnea (OSA)                                                       |
| Laboratory tests            | hemoglobin, albumin, creatinine, glycated hemoglobin, troponin >99th percentile of the normal population, N-terminal pro B-type natriuretic peptide (NT-proBNP), high-sensitivity C-reactive protein (hsCRP) |
| Echocardiography parameters | left atrial diameter (LAD), left ventricular end-diastolic dimension (LVEDD), interventricular septal thickness at diastole (IVSD), and left ventricular ejection fraction (LVEF)                            |
| Electrocardiogram findings  | PR interval, QRS duration, corrected QT interval, and abnormal ECG                                                                                                                                           |

**Table S2.** Comparisons of baseline characteristics between patients with cardiac syncope and those with non-cardiac syncope.

| Characteristics                                     | Cardiac syncope<br>(n = 521) | Non-cardiac syncope<br>(n = 356) | P value |
|-----------------------------------------------------|------------------------------|----------------------------------|---------|
| <b>Demographics</b>                                 |                              |                                  |         |
| Female (%)                                          | 198 (38.0)                   | 160 (44.9)                       | 0.047   |
| Age, y                                              | 59.3 ± 14.8                  | 54.2 ± 14.8                      | <0.001  |
| Body mass index, kg/m <sup>2</sup>                  | 24.8 ± 3.5                   | 24.2 ± 3.5                       | 0.009   |
| SBP, mmHg                                           | 128.0 ± 16.7                 | 127.2 ± 14.8                     | 0.446   |
| DBP, mmHg                                           | 74.6 ± 10.2                  | 75.1 ± 9.9                       | 0.533   |
| HR, bpm                                             | 76.0 ± 36.9                  | 73.7 ± 13.9                      | 0.428   |
| Smoking history (%)                                 | 186 (35.7)                   | 113 (31.7)                       | 0.253   |
| Drinking history (%)                                | 179 (34.4)                   | 119 (33.4)                       | 0.831   |
| <b>Event details</b>                                |                              |                                  |         |
| No. of syncopal events                              | 2.0 ± 1.5                    | 2.5 ± 1.9                        | <0.001  |
| Duration of syncopal spell (%)                      |                              |                                  | 0.256   |
| ≤ 1min                                              | 266 (51.1)                   | 167 (46.9)                       |         |
| 1-5min                                              | 255 (48.9)                   | 189 (53.1)                       |         |
| Presence of specific triggers <sup>a</sup> (%)      | 207 (39.7)                   | 187 (52.5)                       | <0.001  |
| Syncope while sitting or lying or exertion (%)      | 184 (35.3)                   | 83 (23.3)                        | <0.001  |
| Chest symptoms preceding syncope <sup>b</sup> (%)   | 438 (84.1)                   | 165 (46.3)                       | <0.001  |
| Family history of syncope (%)                       | 10 (1.9)                     | 16 (4.5)                         | 0.045   |
| <b>Comorbidities</b>                                |                              |                                  |         |
| Hypertension (%)                                    | 255 (48.9)                   | 162 (45.5)                       | 0.351   |
| Diabetes (%)                                        | 102 (19.6)                   | 57 (16.0)                        | 0.209   |
| Dyslipidemia (%)                                    | 278 (53.4)                   | 203 (57.0)                       | 0.317   |
| Heart disease <sup>c</sup> (%)                      | 377 (72.4)                   | 152 (42.7)                       | <0.001  |
| Vascular disease <sup>d</sup> (%)                   | 129 (24.8)                   | 74 (20.8)                        | 0.198   |
| COPD (%)                                            | 12 (2.3)                     | 11 (3.1)                         | 0.617   |
| OSA (%)                                             | 25 (4.8)                     | 25 (7.0)                         | 0.213   |
| <b>Laboratory values</b>                            |                              |                                  |         |
| Hemoglobin, g/L                                     | 134.5 ± 19.9                 | 134.6 ± 17.7                     | 0.948   |
| Serum albumin, g/L                                  | 41.6 ± 14.8                  | 41.2 ± 5.2                       | 0.606   |
| Serum creatinine, μmol/L                            | 86.1 ± 22.7                  | 81.4 ± 19.2                      | 0.001   |
| Glycated hemoglobin, %                              | 6.1 ± 0.9                    | 6.0 ± 0.9                        | 0.010   |
| Troponin >99 <sup>th</sup> percentile of the normal | 81 (15.5)                    | 22 (6.2)                         | <0.001  |
| NT-proBNP, pg/mL                                    | 212.0 [69.3, 844.0]          | 62.8 [33.1, 152.5]               | <0.001  |
| Log NT-proBNP <sup>e</sup> , pg/mL                  | 5.5 ± 1.6                    | 4.3 ± 1.2                        | <0.001  |
| hsCRP, mg/L                                         | 2.3 [1.5, 4.0]               | 1.8 [1.3, 3.0]                   | <0.001  |
| <b>Echocardiography parameters</b>                  |                              |                                  |         |
| LAD, mm                                             | 37.3 ± 5.8                   | 35.3 ± 5.2                       | <0.001  |
| LVEDD, mm                                           | 48.3 ± 7.8                   | 46.5 ± 4.8                       | <0.001  |
| IVSD, mm                                            | 10.8 ± 3.8                   | 9.7 ± 2.4                        | <0.001  |
| LVEF, %                                             | 57.6 ± 10.8                  | 63.9 ± 5.8                       | <0.001  |
| <b>ECG parameters</b>                               |                              |                                  |         |
| PR interval, ms                                     | 170.7 ± 36.7                 | 163.2 ± 27.8                     | 0.001   |
| QRS duration, ms                                    | 104.9 ± 23.6                 | 97.9 ± 17.2                      | <0.001  |
| QTc interval <sup>f</sup> , ms                      | 419.4 ± 33.4                 | 411.0 ± 30.0                     | <0.001  |

|                               |            |            |        |
|-------------------------------|------------|------------|--------|
| Abnormal ECG <sup>g</sup> (%) | 431 (82.7) | 129 (36.2) | <0.001 |
|-------------------------------|------------|------------|--------|

Notes: a. including coughing, laughter, pain, prolonged standing, distressful stimulus, or medical environment. b. including palpitations, chest pain, and chest tightness. c. including ischaemic or valvular heart disease, cardiomyopathy, congestive heart failure, congenital heart disease, documented history of arrhythmic disease (including atrial or ventricular arrhythmias, conductive system disorders, or a history of pacemaker implantation), and a history of sudden cardiac arrest or resuscitation. d. including transient ischemic attack, cerebrovascular accident, peripheral vascular disease or embolism. e. To minimize the absolute disparities among the data and counteract the impact of outlier values, we have calculated the logarithm of NT-proBNP and integrated it into our model development. f, corrected QT interval. g, including sustained bradycardia (HR<40bpm), atrioventricular block greater than first degree, bundle branch block, ischemic ST-T change, supraventricular or ventricular tachycardia, left or right ventricular hypertrophy, ventricular preexcitation, or a Brugada pattern.

Abbreviations: SBP, systolic blood pressure; DBP, diastolic blood pressure; HR, heart rate; COPD, chronic obstructive pulmonary disease; OSA, obstructive sleep apnea; NT-proBNP, N-terminal pro B-type natriuretic peptide; hsCRP, high-sensitivity C-reactive protein; LAD, left atrial diameter; LVEDD, left ventricular end-diastolic dimension; IVSD, interventricular septal thickness at diastole; LVEF, left ventricular ejection fraction; ECG, electrocardiogram.

Data were presented as numbers (%), mean  $\pm$  standard deviation, or median and interquartile range as appropriate. Groups were compared using the Student's t-test, Mann–Whitney U test, or Chi-square test as appropriate.

**Figure S1.** The ROC curve of the diagnostic score to predict cardiac syncope.

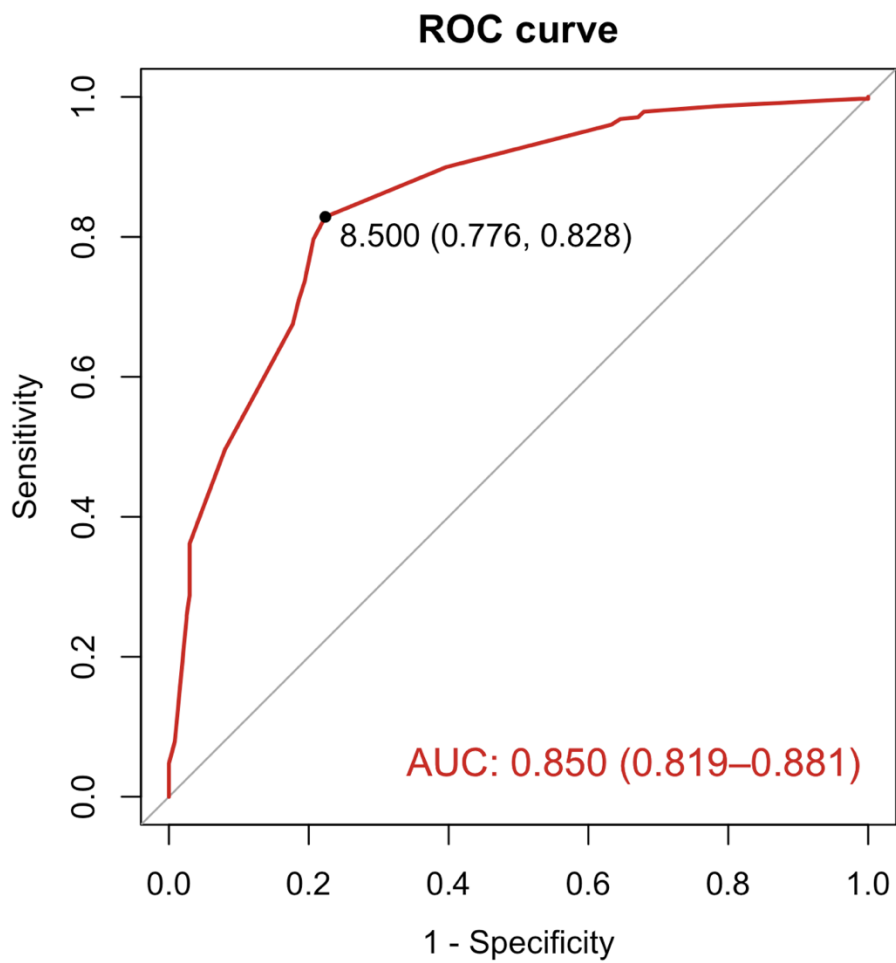

**Table S3.** The assessment of the diagnostic score to predict cardiac syncope.

| <b>Positive if Greater Than or Equal To</b> | <b>Sensitivity</b> | <b>Specificity</b> | <b>Youden Index</b> |
|---------------------------------------------|--------------------|--------------------|---------------------|
| -3                                          | 1                  | 0                  | 0                   |
| -2                                          | 1                  | 0.013              | 0.013               |
| 0                                           | 0.989              | 0.215              | 0.204               |
| 1                                           | 0.982              | 0.321              | 0.303               |
| 2                                           | 0.982              | 0.329              | 0.311               |
| 3                                           | 0.979              | 0.342              | 0.321               |
| 4                                           | 0.976              | 0.346              | 0.322               |
| 5                                           | 0.918              | 0.578              | 0.496               |
| 6                                           | 0.850              | 0.751              | 0.601               |
| 7                                           | 0.821              | 0.768              | 0.589               |
| 8                                           | 0.810              | 0.776              | 0.586               |
| <b>9</b>                                    | <b>0.805</b>       | <b>0.797</b>       | <b>0.602</b>        |
| 10                                          | 0.770              | 0.814              | 0.584               |
| 11                                          | 0.599              | 0.911              | 0.510               |
| 12                                          | 0.462              | 0.962              | 0.424               |
| 13                                          | 0.446              | 0.962              | 0.408               |
| 14                                          | 0.377              | 0.966              | 0.343               |
| 15                                          | 0.351              | 0.966              | 0.317               |
| 16                                          | 0.214              | 0.983              | 0.197               |
| 17                                          | 0.177              | 0.992              | 0.169               |
| 19                                          | 0.077              | 0.992              | 0.069               |
| 20                                          | 0.050              | 0.996              | 0.046               |
| 22                                          | 0.005              | 0.996              | 0.001               |
